# Supplementary material for: Identification and validation of oxeiptosis-associated lncRNAs and prognosis-related signature genes to predict the immune status in uterine corpus endometrial carcinoma
Source: Aging (Albany NY). 2023 May 19;15(10):4236–52. doi: 10.18632/aging.204726 (PMC10258008; doi:10.18632/aging.204726)
Supplement: Supplementary Table 1 [file aging-15-204726-s001.xlsx]

## Sheet: corResult
Supplementary Table 1. A list of lncRNAs significantly associated with oxeiptosis genes.
Oxeiptosis-related genes	lncRNA	Correlation	P-value	Regulation
PGAM5	AC073655.2	-0.205971	1.01069e-06	negative
KEAP1	AL606834.2	-0.25	2.43133e-09	negative
PGAM5	AC131009.3	0.339753	1.95687e-16	postive
KEAP1	AC019069.1	0.277645	2.90261e-11	postive
PGAM5	AC009812.1	-0.220482	1.5846e-07	negative
AIFM1	HOXB-AS3	0.222504	1.21132e-07	postive
KEAP1	AC017104.1	0.26244	3.53162e-10	postive
PGAM5	AC009806.1	-0.243462	6.43448e-09	negative
KEAP1	MIR34AHG	-0.221692	1.34965e-07	negative
PGAM5	TRPM2-AS	-0.267742	1.50395e-10	negative
KEAP1	OIP5-AS1	-0.227457	6.20785e-08	negative
PGAM5	AL353572.4	-0.265849	2.04429e-10	negative
PGAM5	AC073389.3	-0.21445	3.47734e-07	negative
KEAP1	MAN1B1-DT	0.230889	3.87054e-08	postive
PGAM5	AC015802.7	-0.20466	1.18721e-06	negative
AIFM1	AC015802.7	0.223238	1.09819e-07	postive
PGAM5	AC019186.1	-0.210077	6.06184e-07	negative
KEAP1	AC019186.1	-0.239318	1.17551e-08	negative
PGAM5	AL161729.3	-0.253186	1.498e-09	negative
PGAM5	AC125807.2	0.228925	5.07653e-08	postive
KEAP1	AC125807.2	0.270028	1.03489e-10	postive
PGAM5	AC009093.6	-0.261101	4.36775e-10	negative
PGAM5	LINC00240	-0.256786	8.5957e-10	negative
PGAM5	LINC02615	-0.298799	6.88429e-13	negative
PGAM5	AL354696.1	-0.217853	2.23815e-07	negative
KEAP1	AL354696.1	-0.260594	4.73283e-10	negative
KEAP1	AC009802.1	0.253288	1.47467e-09	postive
KEAP1	AC020910.5	0.261891	3.85362e-10	postive
KEAP1	AC093249.2	0.22118	1.44461e-07	postive
PGAM5	RAB11B-AS1	-0.263083	3.18751e-10	negative
PGAM5	RERE-AS1	-0.224074	9.81702e-08	negative
PGAM5	AL354836.1	-0.209405	6.59509e-07	negative
KEAP1	AC005696.1	0.239219	1.1924e-08	postive
PGAM5	AC025871.2	-0.209135	6.82199e-07	negative
KEAP1	AC025871.2	-0.222489	1.21383e-07	negative
PGAM5	DLGAP1-AS2	-0.283923	9.87824e-12	negative
AIFM1	DLGAP1-AS2	-0.240045	1.0585e-08	negative
PGAM5	AC009120.2	-0.240122	1.04679e-08	negative
KEAP1	AL590822.3	0.227228	6.40465e-08	postive
KEAP1	LINC01936	0.231153	3.73144e-08	postive
PGAM5	AC026336.3	-0.233841	2.56334e-08	negative
PGAM5	LINC00342	-0.219211	1.87336e-07	negative
PGAM5	LINC00894	-0.231783	3.41845e-08	negative
PGAM5	SNHG1	0.207162	8.72325e-07	postive
AIFM1	LINC00997	-0.228997	5.02647e-08	negative
KEAP1	AC067930.2	0.201524	1.73784e-06	postive
PGAM5	AC009495.2	-0.214889	3.28659e-07	negative
PGAM5	AC005332.3	-0.291664	2.51879e-12	negative
KEAP1	AC005332.3	-0.268635	1.30023e-10	negative
PGAM5	AL137186.2	-0.217019	2.49498e-07	negative
PGAM5	AC093788.1	-0.24775	3.40926e-09	negative
KEAP1	AC093788.1	-0.252872	1.5716e-09	negative
KEAP1	LINC00205	0.20087	1.88012e-06	postive
PGAM5	AC016229.2	-0.267239	1.6322e-10	negative
KEAP1	BRWD1-AS2	0.227395	6.26021e-08	postive
PGAM5	MIR200CHG	-0.280672	1.73213e-11	negative
KEAP1	AF127577.4	-0.22867	5.25786e-08	negative
PGAM5	AL022328.2	-0.211962	4.77722e-07	negative
PGAM5	AC009974.1	-0.230144	4.29114e-08	negative
PGAM5	AC104463.2	-0.242846	7.0428e-09	negative
PGAM5	AC136475.2	-0.222763	1.17021e-07	negative
PGAM5	AL118558.4	-0.33554	4.80535e-16	negative
KEAP1	AL590560.3	0.263262	3.09751e-10	postive
KEAP1	CBR3-AS1	-0.24249	7.41972e-09	negative
PGAM5	BICRA-AS1	-0.212375	4.53342e-07	negative
PGAM5	AC008764.2	0.223419	1.07188e-07	postive
PGAM5	AL442128.2	-0.232241	3.20704e-08	negative
PGAM5	AC073534.2	-0.266877	1.73109e-10	negative
KEAP1	AC073534.2	-0.224763	8.94712e-08	negative
PGAM5	AC092807.2	-0.210898	5.46639e-07	negative
PGAM5	LINC02604	-0.276589	3.47003e-11	negative
PGAM5	SNHG15	0.212938	4.21945e-07	postive
PGAM5	AC022558.3	-0.221438	1.39595e-07	negative
PGAM5	AC046134.2	-0.219859	1.72027e-07	negative
PGAM5	LINC02795	-0.304157	2.53764e-13	negative
KEAP1	AC011461.1	0.233937	2.52869e-08	postive
KEAP1	AC011978.2	-0.207798	8.06086e-07	negative
AIFM1	AC092809.3	0.21391	3.72664e-07	postive
PGAM5	WWC2-AS2	-0.21259	4.41109e-07	negative
PGAM5	AC025175.1	-0.206238	9.77948e-07	negative
KEAP1	AC025175.1	-0.250899	2.12215e-09	negative
PGAM5	SNHG17	0.204958	1.14462e-06	postive
PGAM5	AF117829.1	-0.249052	2.80483e-09	negative
PGAM5	AC006042.1	-0.346945	4.08961e-17	negative
KEAP1	AC006042.1	-0.21134	5.16901e-07	negative
PGAM5	AC093157.1	-0.255792	1.00295e-09	negative
PGAM5	LINC02649	-0.211276	5.21138e-07	negative
KEAP1	LINC02649	-0.212448	4.49099e-07	negative
PGAM5	AC116667.1	-0.254449	1.23395e-09	negative
KEAP1	AL596442.1	0.245949	4.45813e-09	postive
PGAM5	AC008014.1	-0.209425	6.57898e-07	negative
KEAP1	URB1-AS1	0.231159	3.72859e-08	postive
PGAM5	AL008582.1	-0.256107	9.55063e-10	negative
PGAM5	PSMB8-AS1	-0.235109	2.14366e-08	negative
PGAM5	AC005899.7	-0.245672	4.64553e-09	negative
KEAP1	AP001318.2	-0.227968	5.78868e-08	negative
AIFM1	AC016957.2	0.224124	9.75048e-08	postive
PGAM5	AC009097.2	-0.218283	2.11564e-07	negative
PGAM5	SNHG29	0.210131	6.02106e-07	postive
PGAM5	IRF1-AS1	-0.25357	1.41238e-09	negative
PGAM5	AC026367.1	-0.211672	4.95605e-07	negative
PGAM5	AC011468.5	-0.208792	7.12145e-07	negative
PGAM5	AP003717.1	-0.203602	1.35095e-06	negative
PGAM5	MATN1-AS1	-0.251946	1.81004e-09	negative
AIFM1	AC007996.1	0.227568	6.11407e-08	postive
KEAP1	AC007240.3	0.256256	9.33378e-10	postive
PGAM5	AC004148.1	-0.259416	5.69819e-10	negative
PGAM5	SERTAD4-AS1	-0.314803	3.28475e-14	negative
PGAM5	SRP14-AS1	-0.264551	2.51975e-10	negative
KEAP1	SRP14-AS1	-0.200839	1.88722e-06	negative
PGAM5	WEE2-AS1	-0.262992	3.23393e-10	negative
PGAM5	LINC00886	-0.244696	5.36666e-09	negative
PGAM5	AL031985.3	0.266009	1.99218e-10	postive
PGAM5	RASSF8-AS1	-0.248678	2.96685e-09	negative
PGAM5	LINC01607	-0.26086	4.53752e-10	negative
PGAM5	AC118553.1	-0.213834	3.76327e-07	negative
KEAP1	LINC00526	0.288354	4.54158e-12	postive
PGAM5	AC018648.1	-0.286813	5.96009e-12	negative
PGAM5	AL161729.4	-0.223822	1.01541e-07	negative
KEAP1	LINC00471	0.389945	1.46123e-21	postive
PGAM5	AC087742.1	-0.247418	3.58293e-09	negative
PGAM5	EPCAM-DT	-0.237114	1.61233e-08	negative
PGAM5	LINC01770	-0.267711	1.51155e-10	negative
PGAM5	TBILA	-0.209879	6.21435e-07	negative
PGAM5	ITGB2-AS1	-0.229472	4.70857e-08	negative
PGAM5	AC018809.1	-0.263799	2.8428e-10	negative
AIFM1	AC027031.2	0.200936	1.86527e-06	postive
PGAM5	LINC02352	-0.27247	6.91416e-11	negative
PGAM5	AC018638.6	-0.272855	6.48631e-11	negative
PGAM5	AC008280.2	-0.274696	4.77019e-11	negative
KEAP1	AC008280.2	-0.223042	1.12729e-07	negative
KEAP1	LINC02600	0.204096	1.27207e-06	postive
PGAM5	LEF1-AS1	-0.221826	1.32583e-07	negative
KEAP1	HCG15	0.268626	1.3021e-10	postive
PGAM5	AL136295.7	-0.321549	8.61152e-15	negative
PGAM5	BX322562.1	-0.212678	4.36161e-07	negative
PGAM5	AL353801.3	-0.215861	2.89924e-07	negative
KEAP1	Z98745.2	0.214793	3.32734e-07	postive
PGAM5	MIRLET7A1HG	-0.256944	8.38735e-10	negative
PGAM5	AL021707.7	-0.2461	4.35977e-09	negative
PGAM5	AC007566.1	-0.302736	3.31363e-13	negative
PGAM5	AC004000.1	-0.212607	4.40155e-07	negative
PGAM5	AC010491.1	-0.268713	1.28366e-10	negative
PGAM5	AC006230.1	-0.295983	1.1535e-12	negative
KEAP1	AC006230.1	-0.255533	1.04387e-09	negative
PGAM5	AC005498.3	-0.202834	1.48311e-06	negative
PGAM5	AL118558.3	-0.236244	1.82515e-08	negative
AIFM1	LRP4-AS1	-0.246701	3.98673e-09	negative
PGAM5	AC022364.1	-0.209155	6.80528e-07	negative
KEAP1	AL139289.1	0.220415	1.59857e-07	postive
KEAP1	LLPH-DT	0.26398	2.76153e-10	postive
KEAP1	AL118506.1	0.20229	1.58433e-06	postive
PGAM5	AC139887.2	-0.294673	1.46381e-12	negative
PGAM5	AL158211.1	-0.213825	3.76722e-07	negative
PGAM5	AL353747.3	-0.238577	1.3077e-08	negative
PGAM5	AP001107.9	0.216072	2.82098e-07	postive
PGAM5	AL121917.2	-0.212423	4.50534e-07	negative
PGAM5	LINC02021	-0.279969	1.95376e-11	negative
PGAM5	LINC01355	-0.260809	4.57423e-10	negative
PGAM5	AC010168.2	-0.245216	4.96984e-09	negative
PGAM5	LINC02656	-0.280444	1.80115e-11	negative
KEAP1	LINC02656	-0.228879	5.10865e-08	negative
KEAP1	AL589765.4	0.224019	9.88904e-08	postive
KEAP1	AC116447.1	0.270923	8.93076e-11	postive
KEAP1	AC107068.1	-0.209605	6.43203e-07	negative
PGAM5	AL022345.4	-0.222204	1.26074e-07	negative
PGAM5	AC024257.4	-0.240561	9.8224e-09	negative
KEAP1	AL359091.3	0.342088	1.18253e-16	postive
AIFM1	AP003498.2	0.207818	8.04091e-07	postive
PGAM5	AC099778.1	-0.240728	9.58814e-09	negative
PGAM5	AL022238.2	-0.207115	8.77355e-07	negative
PGAM5	AL021392.1	-0.236948	1.65107e-08	negative
AIFM1	AL096865.1	-0.209421	6.58236e-07	negative
PGAM5	SGMS1-AS1	-0.24062	9.74007e-09	negative
AIFM1	MAFG-DT	-0.203026	1.44902e-06	negative
PGAM5	PPP4R1-AS1	-0.236674	1.71675e-08	negative
KEAP1	TSPEAR-AS1	0.230003	4.37575e-08	postive
KEAP1	AC093627.5	0.229467	4.71198e-08	postive
PGAM5	AL021707.6	-0.26829	1.37551e-10	negative
KEAP1	LINC01842	0.200525	1.95956e-06	postive
PGAM5	AP002026.1	-0.31789	1.7875e-14	negative
KEAP1	AP002026.1	-0.202906	1.47034e-06	negative
PGAM5	AC113143.1	-0.239908	1.07969e-08	negative
KEAP1	AC107294.2	0.362911	1.09207e-18	postive
KEAP1	AL512625.3	0.274532	4.90358e-11	postive
KEAP1	DNAH10OS	0.257339	7.88754e-10	postive
PGAM5	AL136295.6	-0.237711	1.48059e-08	negative
PGAM5	DLG5-AS1	-0.264106	2.70642e-10	negative
KEAP1	AC120114.1	0.2539	1.34254e-09	postive
PGAM5	AC008759.2	-0.234656	2.28514e-08	negative
PGAM5	AC012676.1	0.302075	3.74913e-13	postive
PGAM5	LINC01138	-0.281132	1.60033e-11	negative
PGAM5	AC018638.7	-0.276807	3.34467e-11	negative
KEAP1	AC018638.7	-0.208336	7.53852e-07	negative
PGAM5	KDM2B-DT	0.279147	2.24832e-11	postive
PGAM5	LINC01137	-0.209707	6.35009e-07	negative
PGAM5	RNF213-AS1	-0.233233	2.7916e-08	negative
KEAP1	LINC02761	0.274752	4.72611e-11	postive
PGAM5	SRGAP3-AS4	-0.216056	2.82686e-07	negative
PGAM5	AL445423.1	-0.200159	2.04745e-06	negative
KEAP1	FIGNL2-DT	0.229181	4.9012e-08	postive
PGAM5	MIS18A-AS1	-0.2706	9.41874e-11	negative
AIFM1	AC005082.1	0.201267	1.79245e-06	postive
PGAM5	AC104841.1	-0.221631	1.36069e-07	negative
PGAM5	BOLA3-AS1	0.206987	8.91423e-07	postive
KEAP1	BOLA3-AS1	0.22305	1.12622e-07	postive
PGAM5	AC004863.1	-0.221134	1.45345e-07	negative
PGAM5	AC012557.2	-0.219083	1.90527e-07	negative
KEAP1	AC008764.6	0.264111	2.70404e-10	postive
PGAM5	Z97653.1	-0.226308	7.25891e-08	negative
PGAM5	AC104964.3	-0.304286	2.47708e-13	negative
KEAP1	AC104964.3	-0.203355	1.39226e-06	negative
PGAM5	LINC01238	-0.292901	2.01676e-12	negative
KEAP1	AC007786.1	0.228162	5.63727e-08	postive
PGAM5	AC020978.3	-0.213339	4.00901e-07	negative
PGAM5	AL450384.2	-0.22035	1.61229e-07	negative
KEAP1	LINC01506	0.200938	1.86474e-06	postive
PGAM5	AC129507.2	-0.203857	1.30964e-06	negative
PGAM5	AC005785.1	-0.320865	9.87911e-15	negative
PGAM5	AC060766.4	-0.294961	1.38924e-12	negative
PGAM5	CKMT2-AS1	-0.205969	1.0109e-06	negative
PGAM5	PITPNA-AS1	0.236325	1.80426e-08	postive
PGAM5	AC092718.4	0.213237	4.06161e-07	postive
KEAP1	AC012181.1	-0.264408	2.57828e-10	negative
PGAM5	AC083843.3	-0.276622	3.45104e-11	negative
PGAM5	HEIH	-0.220128	1.66025e-07	negative
PGAM5	AC064807.4	-0.25889	6.18881e-10	negative
PGAM5	AC126118.1	-0.256429	9.08543e-10	negative
KEAP1	AC002310.1	0.208648	7.25008e-07	postive
PGAM5	AL121917.1	-0.249066	2.79898e-09	negative
PGAM5	AL355922.4	-0.232759	2.9831e-08	negative
KEAP1	AC007773.1	0.20366	1.34145e-06	postive
PGAM5	AP003778.1	-0.252889	1.56756e-09	negative
AIFM1	EMX2OS	-0.213934	3.71506e-07	negative
PGAM5	AC092745.5	-0.260913	4.49987e-10	negative
PGAM5	AC083964.1	-0.225504	8.09484e-08	negative
PGAM5	AL512652.1	-0.250716	2.18179e-09	negative
PGAM5	AC027682.4	-0.277707	2.87215e-11	negative
PGAM5	AL135905.1	-0.275354	4.27225e-11	negative
PGAM5	AL513165.1	0.254392	1.24485e-09	postive
PGAM5	SH3BP5-AS1	-0.364848	6.93751e-19	negative
KEAP1	SH3BP5-AS1	-0.226877	6.71836e-08	negative
PGAM5	AC096677.1	-0.242716	7.17841e-09	negative
PGAM5	AC012313.1	0.237821	1.45755e-08	postive
KEAP1	AC099661.1	0.253233	1.48727e-09	postive
PGAM5	LINC01668	-0.218152	2.15224e-07	negative
PGAM5	AC093535.1	-0.207673	8.18672e-07	negative
PGAM5	MIATNB	-0.242001	7.96776e-09	negative
KEAP1	MIR1915HG	0.220381	1.60578e-07	postive
PGAM5	AC099343.3	-0.283084	1.14265e-11	negative
KEAP1	MEIS1-AS3	0.223852	1.01145e-07	postive
PGAM5	Z83745.1	-0.341053	1.47901e-16	negative
PGAM5	AL358472.2	-0.205725	1.04167e-06	negative
PGAM5	AC093726.2	-0.323904	5.35335e-15	negative
KEAP1	AC108488.3	0.207282	8.59364e-07	postive
PGAM5	AC093849.2	-0.221502	1.38426e-07	negative
PGAM5	AC023302.1	-0.23208	3.27991e-08	negative
KEAP1	LNCTAM34A	-0.229523	4.67575e-08	negative
KEAP1	ILF3-DT	0.489082	1.17333e-34	postive
PGAM5	RAD51-AS1	-0.331959	1.0203e-15	negative
KEAP1	RAD51-AS1	-0.201017	1.84725e-06	negative
PGAM5	Z69733.1	-0.234254	2.41834e-08	negative
PGAM5	AC108134.4	-0.23991	1.07933e-08	negative
PGAM5	AC104695.2	-0.228901	5.0932e-08	negative
AIFM1	AC104695.2	-0.203881	1.30575e-06	negative
KEAP1	AL928654.1	0.268501	1.32899e-10	postive
PGAM5	AC091057.1	0.222623	1.19225e-07	postive
PGAM5	AL590101.1	-0.242818	7.07229e-09	negative
AIFM1	B3GALT5-AS1	0.241437	8.64981e-09	postive
PGAM5	AC022306.2	-0.301638	4.06723e-13	negative
KEAP1	AC022306.2	-0.263383	3.03827e-10	negative
KEAP1	AC092117.1	0.265155	2.28646e-10	postive
KEAP1	LY6E-DT	0.316274	2.46013e-14	postive
PGAM5	AC090579.1	-0.225606	7.98406e-08	negative
KEAP1	AC005393.1	0.226917	6.68203e-08	postive
PGAM5	AL021328.1	-0.26046	4.83373e-10	negative
PGAM5	AL390719.2	-0.263225	3.11617e-10	negative
PGAM5	AL159169.3	-0.240086	1.05224e-08	negative
KEAP1	AC135048.3	0.214181	3.59927e-07	postive
PGAM5	AC015922.3	-0.206085	9.96511e-07	negative
PGAM5	AC135050.3	-0.222429	1.2235e-07	negative
KEAP1	AC007342.5	-0.221718	1.34498e-07	negative
PGAM5	GARS1-DT	-0.241489	8.58516e-09	negative
KEAP1	GARS1-DT	-0.214875	3.29255e-07	negative
KEAP1	AC011330.2	-0.20211	1.6192e-06	negative
PGAM5	AC011468.1	-0.264682	2.46705e-10	negative
PGAM5	DLGAP1-AS1	-0.329475	1.71014e-15	negative
AIFM1	DLGAP1-AS1	-0.207268	8.60872e-07	negative
PGAM5	PCAT19	-0.205341	1.09206e-06	negative
PGAM5	ARHGAP27P1-BPTFP1-KPNA2P3	-0.309333	9.48997e-14	negative
KEAP1	ARHGAP27P1-BPTFP1-KPNA2P3	-0.209715	6.34379e-07	negative
AIFM1	AC091563.1	0.21427	3.55838e-07	postive
PGAM5	AL162586.1	-0.273989	5.36886e-11	negative
PGAM5	AC092794.1	-0.225579	8.01345e-08	negative
KEAP1	AC092794.1	-0.211718	4.92745e-07	negative
PGAM5	AP005131.2	-0.264031	2.73874e-10	negative
PGAM5	AC016727.1	-0.217537	2.33214e-07	negative
PGAM5	AL450326.1	0.246751	3.95728e-09	postive
KEAP1	AL117332.1	0.242321	7.60504e-09	postive
PGAM5	LINC00174	-0.305186	2.09027e-13	negative
PGAM5	EXTL3-AS1	-0.249373	2.67261e-09	negative
KEAP1	EXTL3-AS1	-0.260261	4.98828e-10	negative
KEAP1	NOP14-AS1	0.243464	6.43327e-09	postive
PGAM5	AC073508.3	-0.222431	1.22323e-07	negative
AIFM1	HOXA11-AS	-0.243546	6.35563e-09	negative
PGAM5	AC135803.1	-0.230993	3.81556e-08	negative
KEAP1	AC135803.1	-0.208485	7.3993e-07	negative
PGAM5	AC021078.1	-0.203757	1.32568e-06	negative
KEAP1	AC021078.1	-0.212053	4.72228e-07	negative
PGAM5	AP000238.1	-0.230586	4.03677e-08	negative
AIFM1	AL157893.2	-0.210187	5.97877e-07	negative
PGAM5	AC092902.6	-0.271401	8.25308e-11	negative
PGAM5	AC136475.1	-0.285454	7.56459e-12	negative
KEAP1	AC022211.2	0.316562	2.32447e-14	postive
PGAM5	SNRK-AS1	-0.301826	3.92735e-13	negative
KEAP1	SNRK-AS1	-0.212728	4.33417e-07	negative
PGAM5	POLH-AS1	0.247804	3.38209e-09	postive
PGAM5	AC092535.5	-0.230039	4.35399e-08	negative
PGAM5	Z97832.2	-0.259833	5.33656e-10	negative
PGAM5	LINC01184	-0.200302	2.01283e-06	negative
KEAP1	LINC01184	-0.228478	5.39805e-08	negative
PGAM5	AC120053.1	-0.32775	2.44115e-15	negative
PGAM5	CAHM	-0.217733	2.27332e-07	negative
KEAP1	AC036214.2	-0.253431	1.44276e-09	negative
PGAM5	AC142472.1	-0.297647	8.50926e-13	negative
PGAM5	AC104530.1	-0.200299	2.01336e-06	negative
PGAM5	AC124248.1	-0.299453	6.10171e-13	negative
KEAP1	AC022098.4	0.228593	5.31387e-08	postive
PGAM5	SMARCA5-AS1	0.21372	3.81864e-07	postive
PGAM5	AC099332.2	0.202612	1.52363e-06	postive
PGAM5	AC025162.2	-0.229305	4.81818e-08	negative
AIFM1	AL606760.1	0.21029	5.90181e-07	postive
PGAM5	AP001160.4	-0.222553	1.20345e-07	negative
KEAP1	AP001160.4	-0.229511	4.68331e-08	negative
KEAP1	AL596442.2	0.236672	1.71728e-08	postive
PGAM5	AC009148.1	-0.255734	1.01189e-09	negative
PGAM5	AC004982.1	-0.346213	4.80466e-17	negative
KEAP1	AC004982.1	-0.247938	3.31506e-09	negative
PGAM5	AL021707.1	-0.310682	7.31949e-14	negative
PGAM5	AC097641.2	-0.213444	3.95547e-07	negative
KEAP1	AL031775.1	-0.263438	3.01166e-10	negative
PGAM5	AC040977.1	-0.300469	5.05486e-13	negative
PGAM5	AL590652.1	-0.21914	1.89105e-07	negative
PGAM5	AL023581.2	-0.237443	1.5384e-08	negative
PGAM5	AL359220.1	-0.275454	4.20115e-11	negative
KEAP1	AL359220.1	-0.205725	1.04169e-06	negative
PGAM5	AC004522.5	-0.227683	6.01872e-08	negative
PGAM5	AC010976.2	-0.257445	7.75814e-10	negative
AIFM1	FAM181A-AS1	0.214774	3.33524e-07	postive
PGAM5	AL137800.1	0.280598	1.75402e-11	postive
PGAM5	AC093382.1	-0.204555	1.20265e-06	negative
KEAP1	AC093382.1	-0.20451	1.20922e-06	negative
PGAM5	AC015961.2	-0.218811	1.97443e-07	negative
PGAM5	AF111169.3	-0.204068	1.27642e-06	negative
PGAM5	AC007114.1	-0.242567	7.33591e-09	negative
AIFM1	AC007405.2	-0.212141	4.66987e-07	negative
PGAM5	AC016394.2	0.217697	2.2842e-07	postive
PGAM5	AL513190.1	-0.268048	1.43088e-10	negative
KEAP1	AL391834.2	-0.255115	1.11351e-09	negative
PGAM5	AC105052.5	-0.200852	1.88427e-06	negative
KEAP1	AC008736.1	0.201861	1.66855e-06	postive
PGAM5	AL023882.1	-0.242315	7.61085e-09	negative
KEAP1	AC078883.1	-0.248469	3.06119e-09	negative
KEAP1	AC121493.1	-0.261199	4.30054e-10	negative
PGAM5	AC244034.2	-0.240102	1.04972e-08	negative
PGAM5	AL023803.2	0.200637	1.93345e-06	postive
PGAM5	RNF157-AS1	-0.257318	7.91242e-10	negative
PGAM5	AC005332.1	-0.245426	4.81768e-09	negative
PGAM5	TAPT1-AS1	-0.230185	4.26721e-08	negative
KEAP1	TAPT1-AS1	-0.222081	1.2816e-07	negative
PGAM5	PSPC1-AS2	-0.228212	5.59845e-08	negative
KEAP1	PSPC1-AS2	-0.201075	1.83436e-06	negative
AIFM1	LINC00294	-0.214721	3.3581e-07	negative
PGAM5	AC073111.3	-0.293484	1.81522e-12	negative
PGAM5	AC079140.6	-0.267327	1.60901e-10	negative
KEAP1	SNHG21	0.329234	1.7974e-15	postive
KEAP1	AL034550.3	0.21599	2.85104e-07	postive
KEAP1	LINC02575	0.209818	6.2627e-07	postive
PGAM5	AL451054.4	-0.233287	2.77055e-08	negative
PGAM5	MIR22HG	-0.207485	8.38083e-07	negative
PGAM5	AC003035.1	-0.238841	1.25917e-08	negative
PGAM5	AC002044.1	-0.236036	1.87972e-08	negative
PGAM5	AC095057.3	-0.273447	5.87701e-11	negative
KEAP1	AC132938.3	0.209227	6.74421e-07	postive
PGAM5	LINC01004	-0.289904	3.44912e-12	negative
PGAM5	LINC00323	-0.23069	3.97927e-08	negative
PGAM5	AL161772.1	0.287168	5.59914e-12	postive
KEAP1	AC087392.3	-0.207994	7.86682e-07	negative
PGAM5	TMEM161B-AS1	-0.218995	1.92734e-07	negative
PGAM5	CCDC18-AS1	-0.257621	7.54732e-10	negative
PGAM5	AC132872.1	-0.259231	5.86595e-10	negative
KEAP1	CEBPA-DT	0.228267	5.55663e-08	postive
KEAP1	AC245060.2	0.312451	5.19748e-14	postive
KEAP1	SNHG32	0.256779	8.60583e-10	postive
KEAP1	AP000254.2	-0.226987	6.61839e-08	negative
KEAP1	Z69706.1	0.248751	2.93438e-09	postive
PGAM5	LINC02614	-0.222811	1.16275e-07	negative
KEAP1	AC012442.2	0.230926	3.85101e-08	postive
AIFM1	AGAP2-AS1	-0.237934	1.43411e-08	negative
AIFM1	LINC02422	0.213959	3.70328e-07	postive
PGAM5	LINC00921	-0.254357	1.25143e-09	negative
KEAP1	AC234917.3	0.326988	2.85436e-15	postive
PGAM5	AC026401.3	0.253252	1.48288e-09	postive
PGAM5	AL121583.1	-0.282036	1.36963e-11	negative
PGAM5	EMSLR	0.367264	3.92311e-19	postive
PGAM5	LINC00937	-0.289008	4.04458e-12	negative
PGAM5	AC006111.3	-0.216135	2.79807e-07	negative
PGAM5	AL513477.2	-0.219203	1.87545e-07	negative
PGAM5	GMDS-DT	-0.257802	7.33746e-10	negative
PGAM5	AC008035.1	-0.24519	4.98846e-09	negative
PGAM5	U47924.1	-0.263189	3.13389e-10	negative
PGAM5	AC022762.2	-0.206558	9.40021e-07	negative
KEAP1	AL353807.5	0.213409	3.97361e-07	postive
KEAP1	AC006252.1	0.251081	2.06429e-09	postive
PGAM5	AC022306.3	-0.269085	1.20806e-10	negative
KEAP1	AC022306.3	-0.24531	4.90128e-09	negative
PGAM5	AC026402.2	-0.233	2.88433e-08	negative
PGAM5	AL358472.3	-0.227651	6.04521e-08	negative
PGAM5	AL035587.2	-0.242018	7.94861e-09	negative
PGAM5	AC024060.2	-0.302002	3.80056e-13	negative
PGAM5	LINC02175	-0.261894	3.85189e-10	negative
KEAP1	LINC01918	0.204579	1.19913e-06	postive
KEAP1	AP4B1-AS1	-0.226561	7.01324e-08	negative
PGAM5	AC133528.1	-0.252572	1.64534e-09	negative
KEAP1	AL133367.1	0.218129	2.15882e-07	postive
PGAM5	AC097382.3	-0.20714	8.7469e-07	negative
KEAP1	AL590369.1	0.239148	1.20473e-08	postive
PGAM5	AP006545.2	-0.234942	2.19467e-08	negative
PGAM5	AC120349.1	-0.253063	1.52625e-09	negative
PGAM5	AL731533.2	-0.215852	2.90267e-07	negative
KEAP1	SNHG11	0.27539	4.24657e-11	postive
PGAM5	CERNA1	-0.223024	1.1301e-07	negative
KEAP1	CERNA1	-0.23243	3.12337e-08	negative
PGAM5	U47924.3	-0.26376	2.86059e-10	negative
PGAM5	AL354953.1	-0.228369	5.4793e-08	negative
PGAM5	BET1-AS1	-0.225336	8.28115e-08	negative
PGAM5	AL359715.1	-0.260466	4.82967e-10	negative
PGAM5	SLC2A1-AS1	-0.232052	3.29273e-08	negative
PGAM5	AC060766.7	-0.217933	2.21488e-07	negative
KEAP1	AC060766.7	-0.222019	1.29227e-07	negative
AIFM1	AC011462.5	-0.271292	8.40389e-11	negative
KEAP1	AP000662.1	0.296952	9.6638e-13	postive
PGAM5	KIAA1671-AS1	-0.207995	7.86544e-07	negative
PGAM5	AP002840.2	-0.350359	1.91711e-17	negative
KEAP1	THAP9-AS1	-0.210173	5.98935e-07	negative
KEAP1	DNM1P35	0.232445	3.11689e-08	postive
PGAM5	AC245407.2	-0.249615	2.5767e-09	negative
PGAM5	DICER1-AS1	-0.276465	3.54363e-11	negative
PGAM5	AC130456.2	-0.25393	1.33644e-09	negative
PGAM5	FZD10-AS1	-0.256726	8.6768e-10	negative
PGAM5	AL023584.2	-0.202865	1.47758e-06	negative
KEAP1	BAIAP2-DT	0.246201	4.29491e-09	postive
KEAP1	LINC00618	0.289321	3.82561e-12	postive
KEAP1	VIM-AS1	-0.227717	5.99094e-08	negative
PGAM5	AP000813.1	-0.202941	1.46399e-06	negative
KEAP1	AC090907.2	0.227999	5.76451e-08	postive
KEAP1	AC018645.3	-0.245915	4.48106e-09	negative
PGAM5	AL158163.1	-0.237287	1.57313e-08	negative
PGAM5	AC105020.1	-0.215306	3.1146e-07	negative
PGAM5	AC007383.1	-0.245389	4.84418e-09	negative
PGAM5	AP001542.3	0.241991	7.97994e-09	postive
PGAM5	DIO3OS	-0.206098	9.94923e-07	negative
KEAP1	TNFRSF10A-AS1	-0.216451	2.68605e-07	negative
KEAP1	AC104472.4	0.249464	2.63616e-09	postive
KEAP1	LINC00638	0.290944	2.86491e-12	postive
PGAM5	AC074124.1	-0.216266	2.75105e-07	negative
AIFM1	AC074124.1	0.263266	3.0958e-10	postive
PGAM5	AC092745.4	-0.291783	2.46527e-12	negative
PGAM5	AC004825.2	-0.263368	3.04561e-10	negative
PGAM5	AL158063.1	-0.296703	1.01155e-12	negative
KEAP1	AP000759.1	0.228769	5.18686e-08	postive
PGAM5	LINC01176	-0.235046	2.16287e-08	negative
PGAM5	AL135910.1	-0.225503	8.0963e-08	negative
AIFM1	AC026369.2	-0.21276	4.31638e-07	negative
PGAM5	AGBL5-IT1	-0.239266	1.18432e-08	negative
PGAM5	TYMSOS	0.240668	9.67165e-09	postive
PGAM5	LINC01480	-0.20886	7.06105e-07	negative
PGAM5	RTCA-AS1	-0.24217	7.77407e-09	negative
PGAM5	AC007216.3	-0.201078	1.83374e-06	negative
PGAM5	UBA6-AS1	-0.201137	1.82071e-06	negative
PGAM5	AC017083.1	-0.208368	7.50827e-07	negative
PGAM5	ZNF32-AS1	-0.205457	1.07667e-06	negative
PGAM5	AC079322.1	-0.247859	3.35446e-09	negative
KEAP1	AP000873.2	0.244472	5.54686e-09	postive
PGAM5	AC127537.1	-0.223519	1.05754e-07	negative
KEAP1	AC093627.4	0.213007	4.18282e-07	postive
KEAP1	AC092295.2	0.337867	2.93118e-16	postive
PGAM5	AC018529.1	-0.206064	9.99164e-07	negative
KEAP1	OSER1-DT	0.204589	1.19762e-06	postive
KEAP1	AL035458.2	0.243896	6.03712e-09	postive
PGAM5	AC002553.2	-0.249438	2.64653e-09	negative
KEAP1	AC002553.2	-0.226769	6.81784e-08	negative
PGAM5	AC009318.4	-0.26518	2.2773e-10	negative
PGAM5	AC009090.1	-0.207319	8.55429e-07	negative
KEAP1	MMP25-AS1	0.262871	3.29703e-10	postive
PGAM5	AP007216.2	-0.20353	1.36296e-06	negative
PGAM5	AC112187.3	-0.221132	1.45386e-07	negative
PGAM5	AC087500.1	-0.275835	3.94017e-11	negative
PGAM5	AC010201.1	-0.240773	9.52629e-09	negative
KEAP1	AL358472.4	0.208062	7.80047e-07	postive
PGAM5	AC012073.1	0.288845	4.16284e-12	postive
PGAM5	AL157931.1	-0.233758	2.59315e-08	negative
KEAP1	AC020907.1	0.27677	3.3655e-11	postive
PGAM5	AL731566.3	-0.210758	5.56355e-07	negative
KEAP1	AC107294.3	0.304905	2.20405e-13	postive
KEAP1	AL121839.2	-0.209158	6.80287e-07	negative
PGAM5	AC100861.1	0.242561	7.34261e-09	postive
PGAM5	AC245884.8	-0.329751	1.61502e-15	negative
PGAM5	AC008610.1	-0.226225	7.34134e-08	negative
PGAM5	SENCR	-0.267251	1.62906e-10	negative
KEAP1	AL049840.5	-0.216932	2.52316e-07	negative
AIFM1	AL049840.5	-0.220774	1.52452e-07	negative
PGAM5	AC092053.4	-0.244355	5.64294e-09	negative
PGAM5	LINC00893	-0.316021	2.58561e-14	negative
KEAP1	LINC02298	0.210019	6.10651e-07	postive
PGAM5	AC112722.1	-0.234888	2.21146e-08	negative
KEAP1	AC112722.1	-0.202495	1.54543e-06	negative
KEAP1	MRPL20-AS1	0.309782	8.70518e-14	postive
PGAM5	LINC01948	-0.242426	7.48843e-09	negative
PGAM5	ARNILA	-0.205175	1.11466e-06	negative
PGAM5	AC245060.5	-0.235361	2.06865e-08	negative
KEAP1	AC245060.5	-0.200237	2.02848e-06	negative
PGAM5	LINC01011	-0.245877	4.50593e-09	negative
PGAM5	AC090948.3	-0.253845	1.35397e-09	negative
PGAM5	AC018845.3	-0.245958	4.45217e-09	negative
KEAP1	AC018845.3	-0.201817	1.67747e-06	negative
KEAP1	AL662791.1	0.237942	1.43241e-08	postive
PGAM5	AL117379.1	-0.287543	5.24122e-12	negative
PGAM5	AC016737.1	-0.245139	5.0263e-09	negative
PGAM5	AP000255.1	-0.204756	1.1734e-06	negative
PGAM5	AL355388.1	-0.212551	4.43271e-07	negative
PGAM5	AL353747.2	-0.242244	7.69018e-09	negative
KEAP1	AC019131.2	-0.210161	5.99818e-07	negative
AIFM1	LINC01711	-0.214852	3.3021e-07	negative
PGAM5	AC137630.2	-0.201542	1.73413e-06	negative
AIFM1	AL139234.1	0.304242	2.49731e-13	postive
PGAM5	AC244197.2	-0.292952	1.99804e-12	negative
PGAM5	AC005332.5	-0.209086	6.86385e-07	negative
KEAP1	RNASEH1-AS1	0.277266	3.0948e-11	postive
PGAM5	AL162274.2	-0.218486	2.0602e-07	negative
PGAM5	KLF3-AS1	-0.316789	2.22233e-14	negative
PGAM5	AP001330.4	-0.246292	4.2368e-09	negative
KEAP1	AP001330.4	-0.219349	1.83979e-07	negative
PGAM5	AC008752.3	-0.200688	1.92161e-06	negative
KEAP1	CCDC183-AS1	0.211223	5.24597e-07	postive
PGAM5	AL008729.1	-0.222306	1.24373e-07	negative
KEAP1	AC012306.2	0.24173	8.28898e-09	postive
PGAM5	AL512329.2	-0.232558	3.06838e-08	negative
AIFM1	LINC01829	0.234342	2.38869e-08	postive
PGAM5	AC011472.4	-0.262187	3.67643e-10	negative
PGAM5	AL354760.1	-0.227111	6.50722e-08	negative
AIFM1	AP003721.3	0.237322	1.56519e-08	postive
PGAM5	AC010255.1	-0.225984	7.58499e-08	negative
PGAM5	AC110611.1	-0.20383	1.31402e-06	negative
KEAP1	AL118511.1	0.210931	5.44317e-07	postive
PGAM5	AC026471.4	-0.308696	1.07225e-13	negative
KEAP1	AC100803.3	0.21081	5.52725e-07	postive
PGAM5	AL513320.1	-0.208539	7.34996e-07	negative
PGAM5	AC104825.1	-0.361752	1.43038e-18	negative
KEAP1	AC107057.1	0.371087	1.57571e-19	postive
KEAP1	CTBP1-DT	0.287129	5.63747e-12	postive
KEAP1	AL158206.1	-0.218882	1.9561e-07	negative
KEAP1	ZBED5-AS1	-0.20791	7.94865e-07	negative
PGAM5	AP001922.6	-0.203389	1.3864e-06	negative
PGAM5	ARHGAP26-AS1	-0.203219	1.41547e-06	negative
PGAM5	SLC25A30-AS1	-0.231725	3.44622e-08	negative
PGAM5	AC091488.1	-0.333121	7.99946e-16	negative
PGAM5	AC026202.2	-0.20447	1.2152e-06	negative
PGAM5	AP000345.2	-0.213764	3.79716e-07	negative
PGAM5	LMO7-AS1	-0.255707	1.01622e-09	negative
PGAM5	AC025171.4	-0.318084	1.71995e-14	negative
KEAP1	AC025171.4	-0.212258	4.60082e-07	negative
PGAM5	GLYCTK-AS1	-0.257463	7.73631e-10	negative
PGAM5	AL589765.7	-0.216723	2.59284e-07	negative
PGAM5	AL390728.6	-0.29093	2.87223e-12	negative
KEAP1	AL390728.6	-0.251778	1.85702e-09	negative
PGAM5	AC010719.1	-0.214754	3.34399e-07	negative
KEAP1	AC107071.1	-0.224447	9.33594e-08	negative
PGAM5	AC084782.3	-0.223629	1.04206e-07	negative
PGAM5	AC000068.1	0.237621	1.49983e-08	postive
KEAP1	AC000068.1	0.215256	3.13482e-07	postive
AIFM1	AL354863.1	-0.252708	1.6116e-09	negative
PGAM5	VPS9D1-AS1	0.287368	5.4054e-12	postive
KEAP1	AC011509.1	0.2376	1.50438e-08	postive
PGAM5	AC002059.1	-0.212363	4.54004e-07	negative
PGAM5	AC004846.2	-0.21169	4.94509e-07	negative
PGAM5	TMEM92-AS1	-0.260182	5.05056e-10	negative
PGAM5	AC010329.1	-0.231763	3.42786e-08	negative
AIFM1	AP001372.2	0.253157	1.50455e-09	postive
KEAP1	AC002553.1	-0.235305	2.08503e-08	negative
PGAM5	AC092903.2	-0.229608	4.62116e-08	negative
KEAP1	AC105219.1	0.223752	1.0251e-07	postive
PGAM5	AC025754.2	-0.208451	7.43137e-07	negative
PGAM5	AC084824.5	-0.310956	6.94276e-14	negative
PGAM5	AC010300.1	-0.271863	7.64629e-11	negative
PGAM5	AC015726.1	-0.23624	1.82614e-08	negative
KEAP1	AC245884.9	0.200125	2.05585e-06	postive
AIFM1	NRAV	0.212564	4.42519e-07	postive
PGAM5	AC019193.2	-0.225873	7.70034e-08	negative
PGAM5	OGFRP1	0.23207	3.2843e-08	postive
PGAM5	AL157392.4	-0.348017	3.22695e-17	negative
KEAP1	AL157392.4	-0.230043	4.35184e-08	negative
PGAM5	AC108134.1	-0.20453	1.20631e-06	negative
PGAM5	AC087741.1	-0.266788	1.75621e-10	negative
PGAM5	AL353708.3	-0.235246	2.10241e-08	negative
PGAM5	AP000787.1	-0.207851	8.00818e-07	negative
PGAM5	AL355385.1	-0.2359	1.91628e-08	negative
PGAM5	AC008760.1	-0.275747	3.99909e-11	negative
PGAM5	AP002807.1	-0.252661	1.62314e-09	negative
PGAM5	AC010201.2	-0.212253	4.60391e-07	negative
PGAM5	AC048341.1	-0.229208	4.88297e-08	negative
KEAP1	LINC01160	0.212915	4.23222e-07	postive
KEAP1	AL513218.1	-0.228904	5.09169e-08	negative
PGAM5	AC004253.1	-0.201268	1.79236e-06	negative
PGAM5	AC068533.3	-0.203675	1.339e-06	negative
KEAP1	AC116036.2	0.20623	9.78918e-07	postive
PGAM5	AC034236.2	-0.279619	2.07439e-11	negative
PGAM5	AL591895.1	-0.271548	8.05576e-11	negative
KEAP1	ZNF22-AS1	0.389599	1.59656e-21	postive
PGAM5	FSIP2-AS2	-0.286547	6.24549e-12	negative
PGAM5	AC156455.1	0.213493	3.93078e-07	postive
PGAM5	AC003102.1	-0.229281	4.83421e-08	negative
KEAP1	ZDHHC20-IT1	0.223066	1.12374e-07	postive
PGAM5	AC060780.1	-0.280469	1.79329e-11	negative
PGAM5	AC027228.2	0.349846	2.14983e-17	postive
PGAM5	AC139887.4	-0.209704	6.35276e-07	negative
PGAM5	AL357093.1	-0.202544	1.53621e-06	negative
PGAM5	AC124319.2	-0.296305	1.08787e-12	negative
PGAM5	AL109659.2	-0.323833	5.43023e-15	negative
PGAM5	AC113139.1	-0.247995	3.28679e-09	negative
PGAM5	AC005840.4	-0.30045	5.07284e-13	negative
PGAM5	AC068620.2	-0.256706	8.70378e-10	negative
PGAM5	AC011476.3	0.231956	3.33707e-08	postive
PGAM5	AC002542.6	-0.269554	1.11856e-10	negative
PGAM5	AC025034.1	-0.271751	7.789e-11	negative
KEAP1	AC025034.1	-0.210329	5.87227e-07	negative
KEAP1	SCGB1B2P	0.219026	1.91939e-07	postive
PGAM5	AC004471.1	0.20061	1.93967e-06	postive
PGAM5	DBH-AS1	-0.21229	4.58216e-07	negative
PGAM5	ZKSCAN2-DT	-0.204458	1.21689e-06	negative
AIFM1	AL035071.1	-0.210129	6.02243e-07	negative
KEAP1	AC021683.1	0.217414	2.36991e-07	postive
KEAP1	AC109322.2	0.205542	1.06552e-06	postive
AIFM1	BISPR	0.2408	9.48845e-09	postive
KEAP1	AL133153.2	0.200703	1.91826e-06	postive
KEAP1	AC083799.1	-0.275659	4.05828e-11	negative
PGAM5	AL390786.1	-0.205953	1.01286e-06	negative
PGAM5	CARMN	-0.216961	2.51385e-07	negative
PGAM5	UBL7-AS1	0.260425	4.86091e-10	postive
PGAM5	AC009404.1	-0.225472	8.13009e-08	negative
KEAP1	AL132712.2	0.219233	1.86803e-07	postive
PGAM5	AL451165.2	-0.22417	9.69087e-08	negative
KEAP1	LINC01977	0.25932	5.78453e-10	postive
PGAM5	AC008543.4	-0.221068	1.46629e-07	negative
PGAM5	AC013731.1	-0.249396	2.66313e-09	negative
KEAP1	AC013731.1	-0.201002	1.8506e-06	negative
PGAM5	LINC02363	-0.211098	5.32959e-07	negative
AIFM1	TSPOAP1-AS1	-0.207567	8.29548e-07	negative
PGAM5	LINC00926	-0.223619	1.04349e-07	negative
KEAP1	WT1-AS	0.208012	7.84917e-07	postive
AIFM1	AP003721.4	0.224159	9.70502e-08	postive
KEAP1	AC026979.3	-0.211354	5.15984e-07	negative
AIFM1	LINC00622	-0.248441	3.07418e-09	negative
PGAM5	AL445645.1	-0.241139	9.03255e-09	negative
PGAM5	AL009179.1	-0.232126	3.25906e-08	negative
PGAM5	LINC00987	-0.24757	3.50213e-09	negative
PGAM5	AL645940.1	-0.224143	9.72632e-08	negative
PGAM5	AP003419.3	-0.201904	1.66003e-06	negative
AIFM1	AC078860.3	0.213572	3.89126e-07	postive
PGAM5	AC009159.3	-0.214024	3.67246e-07	negative
KEAP1	CRNDE	-0.208922	7.00678e-07	negative
PGAM5	AC079174.2	-0.272377	7.02176e-11	negative
PGAM5	ALOX12-AS1	-0.22096	1.48738e-07	negative
PGAM5	LINC00303	-0.252928	1.55825e-09	negative
KEAP1	LINC00605	0.286382	6.42852e-12	postive
PGAM5	AL136531.1	-0.203343	1.39427e-06	negative
KEAP1	KCTD21-AS1	0.333376	7.58252e-16	postive
PGAM5	AC092119.2	-0.209408	6.5927e-07	negative
KEAP1	CACNA1C-AS2	0.271199	8.53368e-11	postive
PGAM5	AC132872.2	-0.222686	1.18232e-07	negative
PGAM5	AL022322.1	-0.250798	2.15497e-09	negative
KEAP1	ADIRF-AS1	0.219828	1.72731e-07	postive
PGAM5	AC145207.5	0.403339	4.35402e-23	postive
PGAM5	AC097500.1	-0.251638	1.89707e-09	negative
PGAM5	AC069234.4	-0.22256	1.20229e-07	negative
AIFM1	AL355102.4	0.226721	6.86277e-08	postive
PGAM5	TPT1-AS1	-0.25946	5.65853e-10	negative
PGAM5	AC087477.2	-0.23054	4.06247e-08	negative
KEAP1	LINC01224	0.218185	2.14301e-07	postive
PGAM5	AC092375.2	-0.257596	7.57727e-10	negative
PGAM5	AP001830.1	-0.214626	3.39933e-07	negative
PGAM5	AC027307.3	0.291314	2.68151e-12	postive
AIFM1	AC025265.1	-0.21324	4.06013e-07	negative
KEAP1	AC092171.3	0.285005	8.18115e-12	postive
PGAM5	AC024933.1	-0.220093	1.66802e-07	negative
KEAP1	AL354733.3	-0.208824	7.09241e-07	negative
KEAP1	AL359513.1	0.219889	1.71362e-07	postive
PGAM5	LINC00865	-0.210105	6.0407e-07	negative
PGAM5	MIR3936HG	-0.296084	1.13255e-12	negative
PGAM5	AL122125.1	-0.22872	5.22147e-08	negative
AIFM1	AL122125.1	-0.217027	2.4924e-07	negative
PGAM5	AC242842.1	-0.263133	3.16206e-10	negative
PGAM5	AC093620.1	-0.210588	5.68402e-07	negative
PGAM5	AL137847.2	-0.216851	2.55016e-07	negative
PGAM5	TP53TG1	-0.271028	8.77786e-11	negative
PGAM5	AL121655.1	-0.266116	1.95815e-10	negative
PGAM5	LINC00930	-0.246894	3.87392e-09	negative
PGAM5	AL031768.1	-0.292744	2.07442e-12	negative
KEAP1	AL031768.1	-0.218841	1.96655e-07	negative
PGAM5	AC022079.2	-0.260716	4.64223e-10	negative
PGAM5	AL031666.1	-0.252116	1.76384e-09	negative
PGAM5	AL021707.8	-0.21954	1.79415e-07	negative
PGAM5	AL359715.2	-0.250738	2.17474e-09	negative
PGAM5	AC012291.3	-0.217232	2.42689e-07	negative
PGAM5	Z93930.2	-0.253376	1.45491e-09	negative
PGAM5	AC110792.3	-0.226914	6.685e-08	negative
KEAP1	AL078587.2	0.334274	6.27868e-16	postive
PGAM5	AC004908.3	-0.321563	8.58694e-15	negative
KEAP1	AC004908.3	-0.234023	2.49842e-08	negative
PGAM5	PSMA3-AS1	-0.251051	2.07381e-09	negative
KEAP1	PSMA3-AS1	-0.257293	7.94369e-10	negative
KEAP1	AC002467.1	0.216886	2.53843e-07	postive
KEAP1	ARHGAP31-AS1	0.288034	4.80546e-12	postive
