# Supplementary material for: Identification and validation of oxeiptosis-associated lncRNAs and prognosis-related signature genes to predict the immune status in uterine corpus endometrial carcinoma
Source: Aging (Albany NY). 2023 May 19;15(10):4236–52. doi: 10.18632/aging.204726 (PMC10258008; doi:10.18632/aging.204726)
Supplement: Supplementary Table 2 [file aging-15-204726-s002.xlsx]

## Sheet: lncRNA.diff
Supplementary Table 2. Differentially expressed lncRNAs in UCEC.
lncRNA	ConMean	TreatMean	LogFC	P-value	FDR
AC131009.3	0.671097	2.03558	1.60085	1.63578e-13	1.86351e-12
AC009812.1	2.10633	0.781569	-1.43029	3.59488e-19	2.3207e-17
HOXB-AS3	2.40371	9.08842	1.91877	5.97982e-07	2.11846e-06
AC017104.1	1.76116	0.824258	-1.09536	4.6133e-11	3.52675e-10
AC009806.1	1.37627	0.27627	-2.31662	1.8421e-19	1.52895e-17
TRPM2-AS	0.368869	3.58063	3.27904	1.73002e-18	7.73185e-17
AC015802.7	0.651269	1.54541	1.24666	0.0150735	0.02323
AL161729.3	0.298566	1.0345	1.79281	3.56011e-06	1.0944e-05
AC093249.2	0.153643	0.349097	1.18405	9.40693e-05	0.000219744
AL354836.1	3.16636	8.71288	1.46033	7.16028e-09	3.58631e-08
AC025871.2	0.140531	0.30142	1.10088	0.000176425	0.000394242
LINC01936	0.645477	0.287784	-1.16538	1.43862e-11	1.16089e-10
AC026336.3	4.17273	8.77074	1.07171	0.00228669	0.00419106
BRWD1-AS2	0.606783	1.22422	1.01261	9.58426e-08	3.92145e-07
MIR200CHG	6.9134	21.531	1.63895	1.63278e-10	1.0659e-09
AC136475.2	3.92501	1.31013	-1.58299	6.67509e-16	1.25104e-14
AC008764.2	5.22178	2.12775	-1.29521	3.27702e-13	3.59235e-12
AC092807.2	1.03766	0.347902	-1.57658	3.21451e-10	1.98684e-09
LINC02795	0.141957	0.290212	1.03165	0.00993747	0.0159935
WWC2-AS2	0.692137	0.260759	-1.40834	3.41089e-17	9.00785e-16
AC025175.1	1.54709	0.572699	-1.43371	1.04299e-09	5.94095e-09
AL596442.1	0.0112171	0.35519	4.98481	2.28956e-05	6.15849e-05
AC009097.2	0.245931	0.56701	1.20512	1.35987e-06	4.51478e-06
AC007996.1	2.20884	8.77254	1.98971	2.8594e-13	3.19483e-12
AC007240.3	0.174729	0.549055	1.65183	6.61473e-11	4.86476e-10
SERTAD4-AS1	12.3046	3.12231	-1.97851	8.44542e-18	2.88635e-16
LINC00886	1.18449	0.446457	-1.40768	1.23712e-12	1.23926e-11
RASSF8-AS1	0.915909	0.351238	-1.38275	3.86446e-16	7.74225e-15
LINC01607	0.0899371	0.266087	1.56491	4.70727e-10	2.81951e-09
LINC00526	1.52527	0.450866	-1.75829	7.51454e-18	2.72872e-16
TBILA	0.190143	0.412615	1.11771	3.03782e-06	9.54041e-06
LINC02600	5.21142	1.393	-1.90348	7.40372e-11	5.24581e-10
LEF1-AS1	0.170549	0.523691	1.61853	0.00262075	0.00469955
AL353801.3	0.154271	0.321336	1.05861	0.000226844	0.000501126
Z98745.2	0.730166	0.170561	-2.09794	7.37106e-14	9.11188e-13
AC007566.1	0.715594	0.343296	-1.05969	3.78904e-11	2.93524e-10
LRP4-AS1	0.0913971	0.304164	1.73463	2.45486e-06	7.83665e-06
AC022364.1	1.48328	0.663505	-1.16061	4.87965e-17	1.23264e-15
AL158211.1	0.962711	0.217777	-2.14425	3.09351e-17	8.55872e-16
LINC02021	0.745823	0.371209	-1.0066	2.95233e-10	1.84441e-09
AL589765.4	0.46248	1.27643	1.46465	3.4843e-09	1.80748e-08
AL022345.4	1.78409	0.653306	-1.44936	4.97718e-07	1.79611e-06
AP003498.2	0.899991	2.54194	1.49794	1.1734e-07	4.66947e-07
LINC01842	0.193931	0.61031	1.654	0.00272525	0.00487192
DNAH10OS	0.310746	0.679283	1.12828	0.000628007	0.00127578
AL445423.1	0.792546	0.221305	-1.84046	1.48333e-10	9.90591e-10
AC005082.1	1.5062	4.72646	1.64984	2.80953e-05	7.45359e-05
AC092718.4	2.67683	10.5796	1.98269	1.09217e-16	2.53819e-15
AC007773.1	0.525423	1.17875	1.1657	1.45931e-07	5.72205e-07
AP003778.1	0.573349	0.215119	-1.41428	6.12288e-11	4.61999e-10
AC092745.5	0.560271	0.256276	-1.12843	4.84423e-06	1.42868e-05
AC099661.1	0.430551	0.193165	-1.15635	6.06702e-05	0.000149997
AC099343.3	0.542457	0.253098	-1.09981	9.09702e-09	4.44148e-08
AC093849.2	3.63121	0.303488	-3.58074	1.19787e-22	6.9596e-20
AC091057.1	0.20854	1.13322	2.44203	3.09863e-19	2.25038e-17
AC022306.2	2.55239	1.01492	-1.33048	1.04135e-15	1.83341e-14
AC092117.1	1.28856	0.525872	-1.29297	5.08667e-06	1.4851e-05
AL021328.1	0.192674	0.492561	1.35414	0.00392259	0.00682343
AL390719.2	4.03038	13.5649	1.75089	4.36654e-10	2.64267e-09
AC015922.3	12.4054	5.68322	-1.12619	3.50904e-15	5.51014e-14
AC007342.5	0.193874	0.721043	1.89496	3.8678e-08	1.68962e-07
AL162586.1	2.41504	0.878573	-1.45881	1.4915e-13	1.73312e-12
AP005131.2	0.131871	0.313055	1.24729	0.0214599	0.031888
AL450326.1	1.65589	0.710539	-1.22062	7.53843e-15	1.09496e-13
AC135803.1	3.16354	1.22642	-1.36708	8.71959e-13	9.35256e-12
AC092902.6	1.03859	0.418782	-1.31035	1.19333e-09	6.6666e-09
AC136475.1	1.75566	0.572721	-1.61611	1.34788e-15	2.23748e-14
POLH-AS1	0.414211	1.23027	1.57053	3.98335e-15	6.09034e-14
AC036214.2	0.404491	0.864248	1.09534	5.24031e-09	2.67864e-08
AC022098.4	0.112631	0.315496	1.48601	3.56272e-05	9.28225e-05
AL359220.1	0.5335	0.263598	-1.01715	1.32151e-10	8.92787e-10
AC010976.2	0.855174	0.177099	-2.27166	2.66613e-09	1.4082e-08
AC093382.1	0.160977	0.367344	1.19028	3.00717e-05	7.94166e-05
AC007405.2	0.0616371	0.527851	3.09826	3.79136e-08	1.66877e-07
AL391834.2	3.52996	1.31762	-1.42172	7.88983e-20	7.63998e-18
AL023803.2	0.0874314	0.782839	3.16249	1.72121e-17	5.44055e-16
MIR22HG	6.74195	2.69106	-1.32499	1.04886e-07	4.26147e-07
AC002044.1	0.816266	1.89447	1.21469	0.0170223	0.0257163
AL161772.1	0.149517	0.39218	1.39121	4.37747e-07	1.60969e-06
AC132872.1	8.41366	3.38412	-1.31396	2.52808e-16	5.24576e-15
CEBPA-DT	3.26454	0.829124	-1.97722	3.72592e-14	5.15419e-13
LINC00921	0.951826	0.362866	-1.39126	3.17544e-18	1.31781e-16
EMSLR	0.101097	0.264851	1.38944	0.000469217	0.000991328
U47924.1	0.276149	0.610908	1.14551	1.12903e-06	3.88146e-06
AL353807.5	0.209049	0.866019	2.05056	1.56775e-08	7.34566e-08
AC022306.3	0.528337	0.216666	-1.28599	1.34265e-11	1.1144e-10
AC026402.2	0.980914	0.327947	-1.58066	0.00501099	0.00856291
LINC02175	0.549266	0.19028	-1.52938	1.58027e-16	3.4005e-15
AC133528.1	0.572206	1.16177	1.02171	0.000272168	0.000592246
AC097382.3	4.89113	1.9809	-1.30401	4.73334e-16	9.1669e-15
AL731533.2	1.3217	0.625364	-1.07962	1.38115e-11	1.13021e-10
AL354953.1	1.74175	4.83496	1.47297	8.89052e-05	0.000209975
DNM1P35	0.837043	0.236091	-1.82596	1.77918e-17	5.44055e-16
AC130456.2	0.1373	0.326117	1.24806	0.00654758	0.0109315
AL158163.1	0.680791	0.253273	-1.42652	1.28899e-16	2.8804e-15
DIO3OS	4.31595	0.348206	-3.63167	1.84916e-21	4.53872e-19
AC092745.4	0.607823	0.213326	-1.51059	0.00131699	0.00250877
LINC01176	0.382849	0.793556	1.05156	0.000349682	0.00074693
AL135910.1	0.990106	0.490499	-1.01333	3.77993e-10	2.31172e-09
TYMSOS	0.0998514	0.513277	2.36188	2.50931e-17	7.28954e-16
AC007216.3	0.138229	0.329859	1.25479	0.00115084	0.00221404
AC018529.1	0.687386	0.195131	-1.81668	5.73996e-14	7.57936e-13
AC012073.1	0.354086	1.52845	2.1099	6.06183e-19	3.20175e-17
AL157931.1	7.81239	17.8506	1.19214	0.00931802	0.0150506
AC020907.1	0.110831	1.25938	3.50627	7.84192e-14	9.49199e-13
AC100861.1	0.338454	0.768871	1.18378	1.02717e-09	5.90877e-09
SENCR	1.1624	0.473636	-1.29525	1.81596e-09	9.86052e-09
AC019131.2	2.67202	1.33389	-1.00229	1.14884e-12	1.19193e-11
LINC01711	0.0873171	0.270078	1.62904	0.00351069	0.00619973
AC244197.2	0.594351	0.274055	-1.11685	0.0129937	0.0203487
KLF3-AS1	1.88165	0.841896	-1.16029	1.33113e-11	1.1144e-10
AP001330.4	2.22149	0.967762	-1.1988	7.97646e-12	7.0217e-11
CCDC183-AS1	0.39444	0.958303	1.28068	2.47364e-08	1.10552e-07
AC011472.4	4.16492	1.05118	-1.98628	3.83761e-18	1.48643e-16
AL118511.1	0.106391	0.220856	1.05372	3.86825e-05	9.98867e-05
AC100803.3	1.70167	0.569126	-1.58013	1.21005e-12	1.23341e-11
AP001922.6	0.789894	0.34554	-1.19281	2.29979e-11	1.80564e-10
VPS9D1-AS1	2.70083	7.54904	1.48289	7.15551e-11	5.13253e-10
AC002059.1	0.252909	0.538049	1.08912	2.3429e-05	6.27293e-05
AC004846.2	0.165009	0.440612	1.41697	1.66183e-06	5.42428e-06
AC105219.1	0.0736057	0.381238	2.3728	1.08637e-07	4.35298e-07
AC015726.1	3.25009	1.41069	-1.20408	8.3809e-16	1.52166e-14
AC245884.9	0.733209	0.185561	-1.98233	0.00157132	0.00294495
AC019193.2	0.64768	0.180866	-1.84036	6.23955e-17	1.51049e-15
OGFRP1	0.520766	1.1684	1.16583	6.92382e-14	8.93942e-13
AC108134.1	0.169723	0.430546	1.34299	7.46811e-08	3.07728e-07
LINC01160	0.532614	0.193411	-1.46142	8.85354e-13	9.35256e-12
AL513218.1	0.142429	0.338933	1.25076	3.98984e-06	1.18877e-05
AC156455.1	2.22015	0.729784	-1.60512	4.03112e-14	5.4467e-13
ZDHHC20-IT1	0.280043	0.71763	1.35759	1.07425e-07	4.33428e-07
AC027228.2	0.0762	0.417998	2.45563	6.44847e-12	5.76394e-11
AC004471.1	0.211549	0.513234	1.27863	7.37697e-06	2.11134e-05
AL133153.2	0.147666	0.391002	1.40484	1.15341e-06	3.94195e-06
AC083799.1	6.96649	14.4962	1.05717	6.82151e-11	4.95412e-10
AL390786.1	0.1255	0.901043	2.84391	0.0240152	0.0353237
CARMN	3.97676	0.349046	-3.5101	1.7853e-20	2.07452e-18
AL132712.2	0.531111	1.06835	1.0083	2.28904e-06	7.3885e-06
LINC01977	0.154723	0.785843	2.34456	4.52073e-12	4.10397e-11
AC013731.1	0.248569	0.578906	1.21968	3.74196e-06	1.14406e-05
LINC02363	0.0696171	0.231099	1.731	1.68608e-11	1.34193e-10
WT1-AS	3.48767	0.405461	-3.10463	4.70404e-21	6.83261e-19
AC078860.3	0.180303	0.528611	1.55178	0.00230676	0.00421456
AC009159.3	1.27583	0.253239	-2.33287	5.31447e-19	3.08771e-17
LINC00605	0.613463	0.2482	-1.30547	1.2933e-15	2.21001e-14
CACNA1C-AS2	0.203906	0.533751	1.38826	0.0239436	0.0353078
AL022322.1	0.822274	2.21758	1.4313	1.25066e-06	4.24932e-06
ADIRF-AS1	1.68977	0.49045	-1.78464	1.92973e-14	2.73457e-13
AC087477.2	1.68447	0.202332	-3.0575	2.34357e-21	4.53872e-19
LINC01224	0.11668	1.34442	3.52635	3.96059e-08	1.70452e-07
AC027307.3	1.096	0.302317	-1.85812	1.30239e-18	6.30576e-17
AC092171.3	0.468409	1.08819	1.21608	6.06476e-08	2.53498e-07
AL359513.1	0.513851	1.48098	1.52713	8.56806e-12	7.42992e-11
LINC00930	0.640517	1.64568	1.36137	0.0157342	0.0240567
AC022079.2	0.647163	0.317704	-1.02645	1.86434e-10	1.20353e-09
AL031666.1	0.458517	1.32039	1.52592	1.35465e-06	4.51478e-06
AL359715.2	0.591946	0.284973	-1.05464	1.62724e-10	1.0659e-09
AC110792.3	1.10982	0.479908	-1.2095	1.59508e-12	1.57074e-11
AL078587.2	0.186103	0.507497	1.4473	1.40783e-08	6.70418e-08
